# Supplementary material
Source: publisher figshare collection journal article supplement (https://tandf.figshare.com/ndownloader/files/17580992)
Supplement: Supplementary file 1 [file 17580992]

**Table S1. Primer sequences used for qRT-PCR.**

| Gene | Primer | Description |
| --- | --- | --- |
| ***csgA*** | Forward 5'- GGG CTC AGA TGA CAG CTC AAT C -3' | Curli subunit, major curli subunit |
| Reverse 5'- GCC GTT CCA CTG ATC AAG AGT AG -3' |
| ***csgB*** | Forward 5'- CAT AAT TGG TCA AGC TGG GAC TAA -3' | Curli nucleator protein curlin CsgB |
| Reverse 5'- GCA ACA ACC GCC AAA AGT TT -3' |
| ***fimA*** | Forward 5'- ACT CTG GCA ATC GTT GTT CTG TCG -3' | Fimbrin type 1, major structural subunit |
| Reverse 5'- ATC AAC AGA GCC TGC ATC AAC TGC -3' |
| ***fimH*** | Forward 5'- GAT GCG GGC AAC TCG ATT -3' | Minor type 1 fimbrial subunit |
| Reverse 5'- CCC TGC GCG GGT GAA -3' |
| ***motA*** | Forward 5'- ACA GGT AGC GCG TTC TCA CT -3' | Motility protein A |
| Reverse 5'- AGC GTG GAT AAA CCG ATA CG -3' |
| ***papA*** | Forward 5'- GTG CCT GCA GAA AAT GCA GAT -3' | Major pilin protein PapA; P-fimbriae major subunit |
| Reverse 5'- CCC GTT TTC CAC TCG AAT CA -3' |
| ***sfaS*** | Forward 5'- TCT CAC CGG ATG CCA GAA TAT -3' | S-fimbrial adhesin protein SfaS |
| Reverse 5'- GCC CAT CCG CAG TAC CAC TA -3' |
| ***rrsG*** | Forward 5’- CCA GGG CTA CAC ACG TGC TA -3’ | 16S ribosomal RNA  (housekeeping gene) |
| Reverse 5’- TCT CGC GAG GTC GCT TCT -3’ |

**
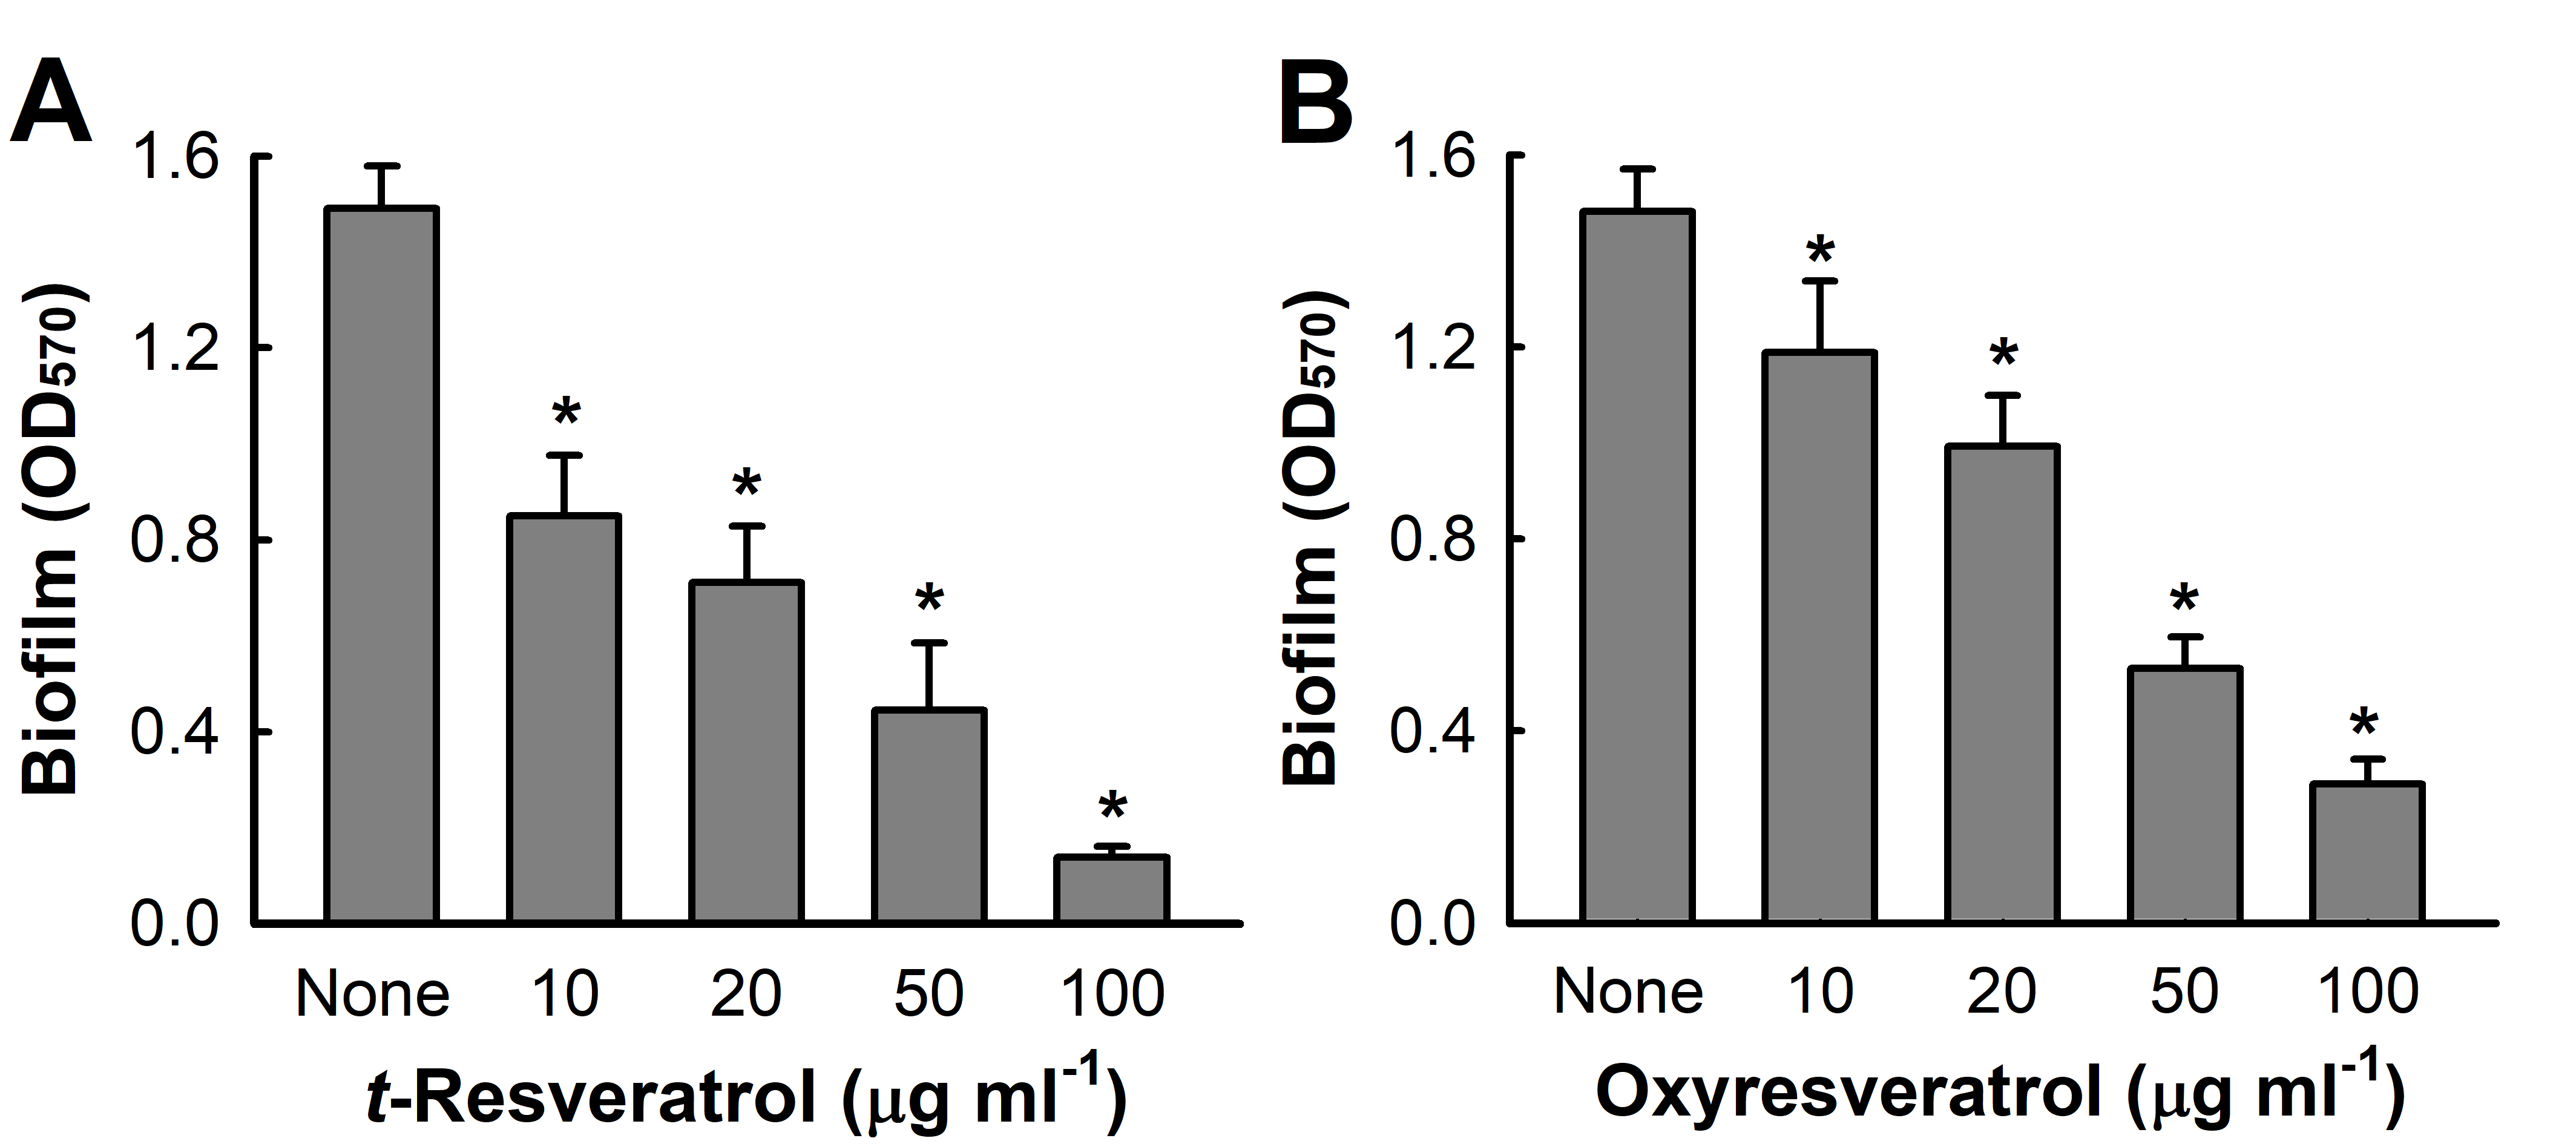
**

**Figure S1. Antibiofilm activities of *t*-resveratrol and oxyresveratrol against UPEC ATCC 11775 strain.** Biofilm formation (OD570) by UPEC was quantified after culture in 96-well polystyrene plates in the presence of *t*-resveratrol (A) or oxyresveratrol (B). *P* < 0.05 *versus* non-treated controls.

**
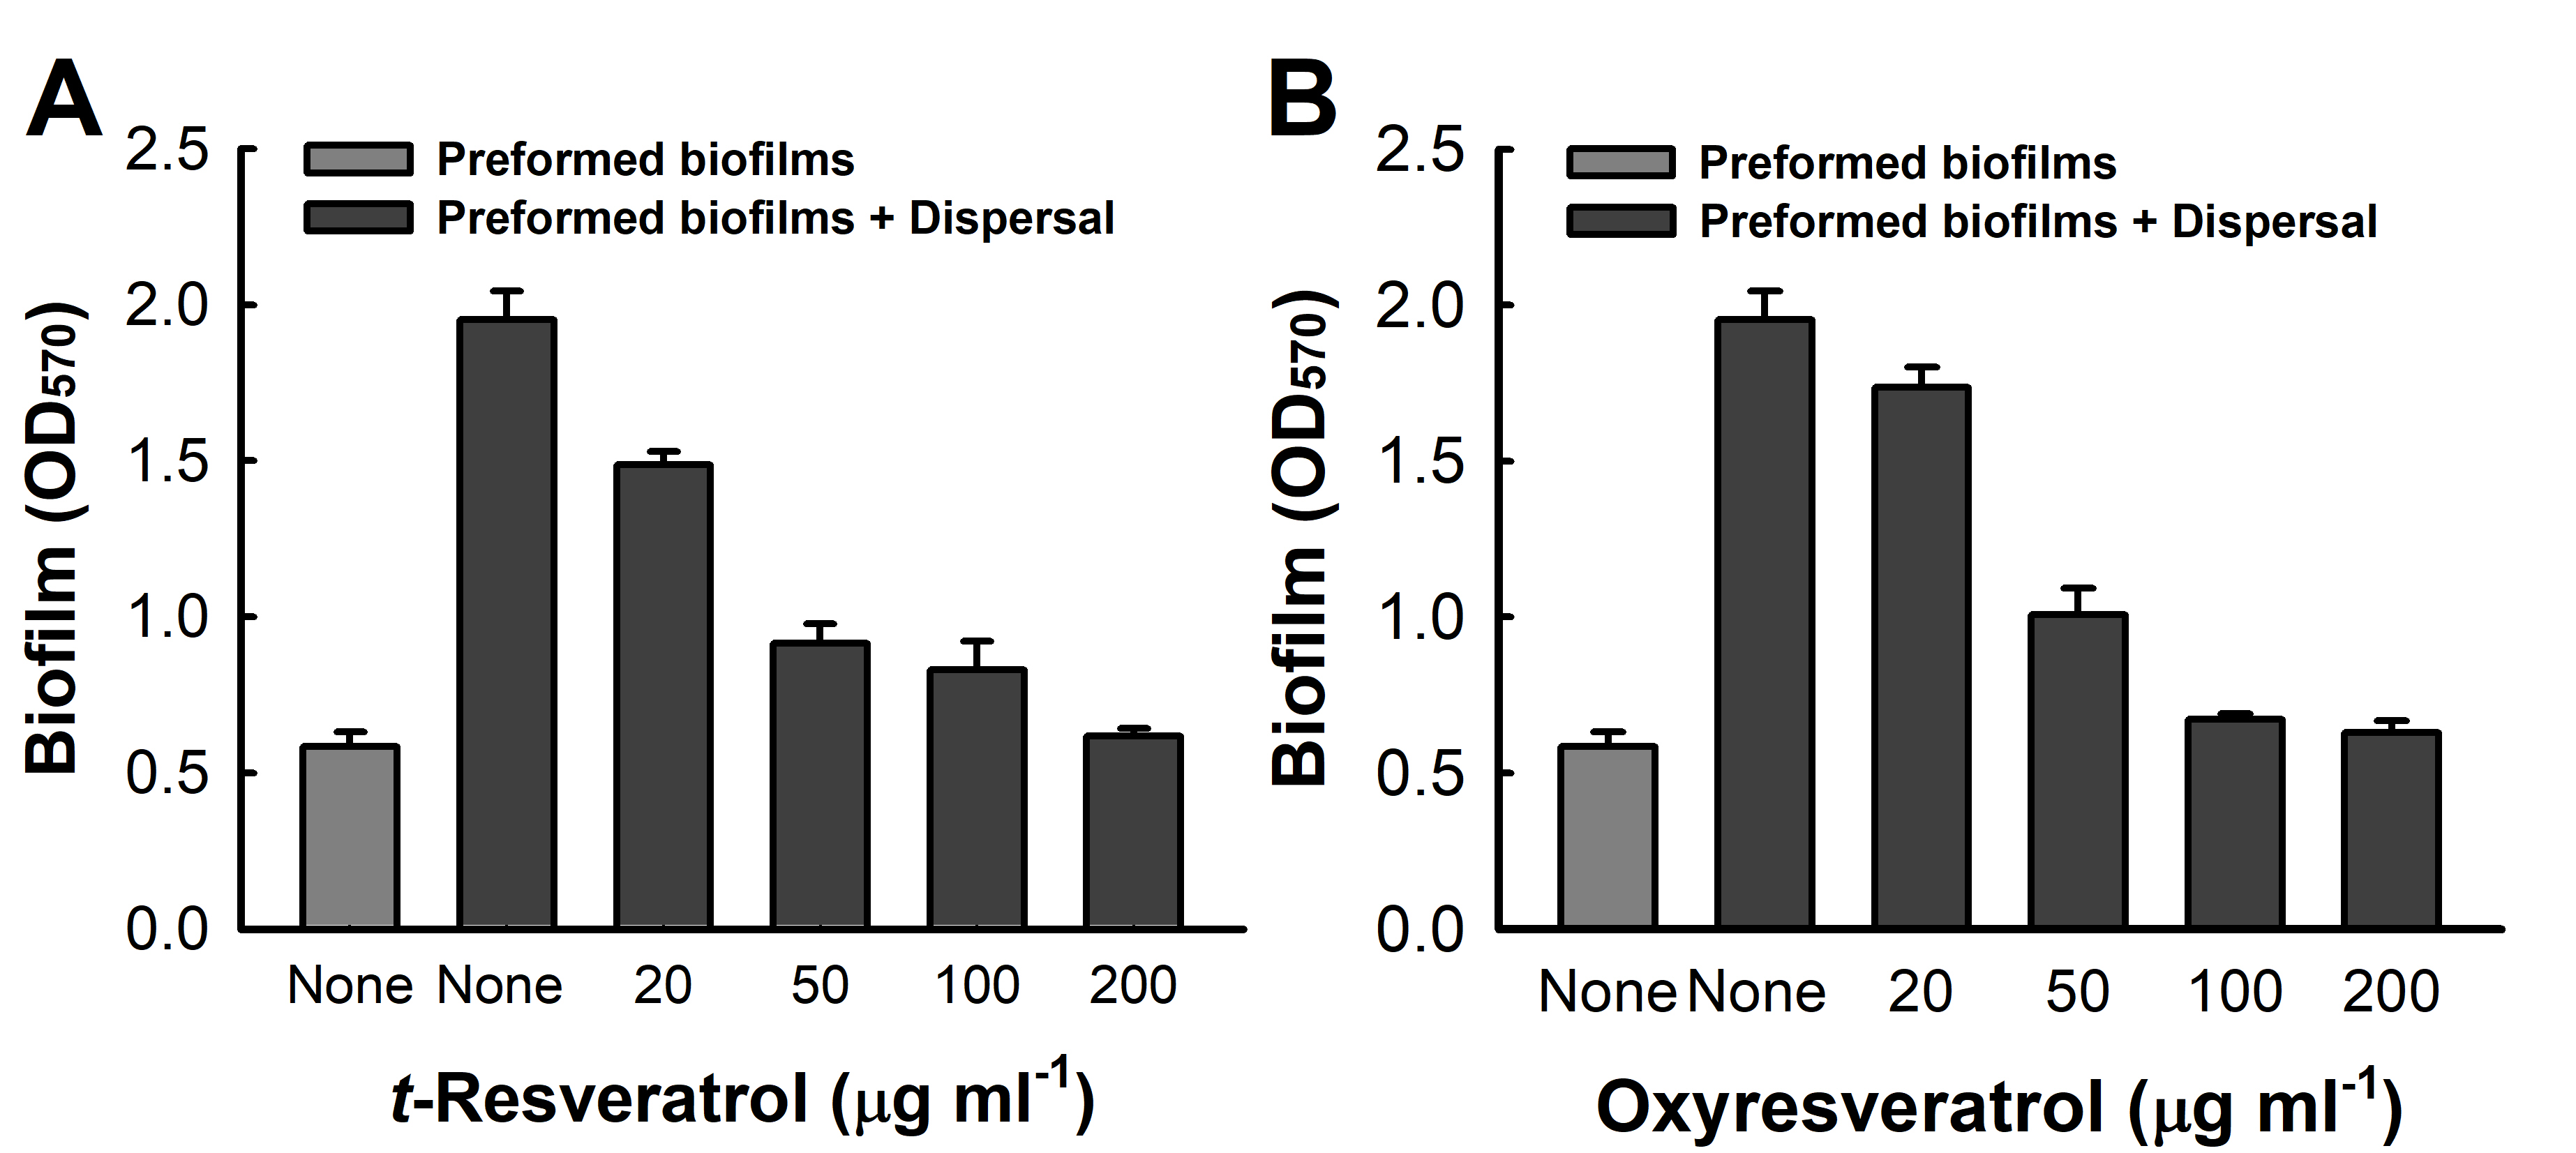
**

**Figure S2. The effects of *t*-resveratrol and oxyresveratrol on established UPECbiofilms.** Biofilm dispersal was investigated in 96-well polystyrene plates at 37 oC. Cells were cultured to form biofilm for 15 h without shaking, and then *t*-resveratrol (A) or oxyresveratrol (B) was added and incubated for 24 h more. Total biofilm formation was measured at OD570. *P* < 0.05 *versus* non-treated controls.
